# Supplementary material for: Friedreich’s ataxia-associated childhood hypertrophic cardiomyopathy: a national cohort study
Source: PubMed Central journal article supplement (PMC9046745; doi:10.1136/archdischild-2021-322455), 2021-10-05
Supplement: archdischild-2021-322455supp001.pdf [file archdischild-2021-322455supp001.pdf]

### Supplementary methods

Echocardiographic measurements were made according to current guidelines (1). Specifically, MLVWT was measured in the parasternal long-axis or parasternal short-axis views (2D or M-Mode) at end diastole. Extreme left ventricular hypertrophy (LVH) was defined as a MLVWT  $\geq 30$ mm or Z score  $\geq 6$  (1). LV diastolic dysfunction was assessed to be present if two out of four variables used to assess diastolic function (annular E' velocity, septal E' velocity, average E/E' ratio, LA diameter) were out of normal range for age and body surface area (2, 3). LV systolic dysfunction was defined as a LV fractional shortening  $\leq 28\%$  or ejection fraction  $\leq 55\%$  (4). Left ventricular outflow tract (LVOT) obstruction (LVOTO) was defined as a maximal LVOT gradient of  $\geq 30$ mmHg (1).

12-lead ECGs were analysed by one observer (T.R) unaware of the clinical details of the patients. ECGs were excluded if trace quality was poor. Age-specific normal values for ECG parameters were used (5). The following parameters were measured (average of 3 beats) from lead II, or V5 if quality of trace was poor: heart rate (bpm), QRS axis, PR interval (ms), Sokolow-Lyon score (SV1 or SV2 + RV5 or RV6  $\geq 35$ mV)(6), QT interval (ms) and corrected QT interval (ms) using Bazett's formula(7) . The presence of the following parameters were described: dominant S wave in V4, pathological Q waves, pathological T wave inversion ( $>1$ mm beyond V1 aged  $\geq 14$  years, or beyond V3 aged  $< 14$  years), ST segment depression ( $\geq 2$ mm in any lead), and ST segment elevation ( $\geq 2$  mm in leads V1-V3, or  $\geq 1$ mm in all other leads).

Non-sustained ventricular tachycardia (NSVT) during ambulatory ECG monitoring was defined as three or more consecutive ventricular beats at a rate of greater than 120 beats/min with a duration of less than 30 seconds(1).

### Supplementary tables

**Supplementary table 1: Clinical characteristics of patients with and without heart failure symptoms**

|                                            |                                      | <b>Heart failure symptoms (n=11)</b> | <b>No heart failure symptoms (n=61)</b> | <b>P value</b>                          |
|--------------------------------------------|--------------------------------------|--------------------------------------|-----------------------------------------|-----------------------------------------|
| <b>Baseline clinical assessment (n=72)</b> | <b>Any symptoms</b>                  | 11 (100%)                            | 13 (21.3%)                              | <0.001                                  |
|                                            | <b>Mean MLVWT (+/-SD)</b>            | 12.88 (2.03)                         | 12.77 (2.65)                            | 0.9105                                  |
|                                            | <b>Concentric hypertrophy</b>        | 9 (81.8%)                            | 56 (91.8%)                              | 0.304                                   |
|                                            | <b>LVOT obstruction (n=67)</b>       | 0 (0%)                               | 2 (3.5%)                                | 0.572                                   |
|                                            | <b>Systolic impairment (n=49)</b>    | 2 (33.3%)                            | 5 (9.3%)                                | 0.093                                   |
|                                            | <b>Diastolic impairment (n=39)</b>   | 1 (25.0%)                            | 5 (14.3%)                               | 0.574                                   |
|                                            |                                      |                                      | <b>Heart failure symptoms (n=11)</b>    | <b>No heart failure symptoms (n=65)</b> |
| <b>Last clinical assessment (n=76)</b>     | <b>Any symptoms</b>                  | 1 (12.5%)                            | 10 (10.3%)                              | 0.867                                   |
|                                            | <b>Mean MLVWT (+/-SD)</b>            | 12.82 (1.73)                         | 13.01 (3.10)                            | 0.883                                   |
|                                            | <b>Concentric hypertrophy (n=64)</b> | 9 (90%)                              | 59 (90.7%)                              | 0.879                                   |
|                                            | <b>LVOT obstruction (n=17)</b>       | 1 (33.3%)                            | 0 (0.0%)                                | 0.026                                   |
|                                            | <b>Systolic impairment (n=47)</b>    | 1 (16.7%)                            | 3 (7.3%)                                | 0.443                                   |
|                                            | <b>Diastolic impairment (n=33)</b>   | 2 (50.0%)                            | 8 (27.6%)                               | 0.361                                   |

NYHA = New York Heart Association, LVOT = left ventricular outflow tract

**Supplementary table 2: Baseline clinical characteristics of patients by era of presentation**

|                                    | Pre-2000<br>(n=11) | 2000 –<br>2009<br>(n=32) | 2010 –<br>2018<br>(n=30) | P value |
|------------------------------------|--------------------|--------------------------|--------------------------|---------|
| <b>Age of HCM diagnosis</b>        | 9.8 (+/-3.4)       | 10.6 (+/-<br>2.2)        | 11.4 (+/-<br>3.8)        | 0.013   |
| <b>Baseline cardiac assessment</b> |                    |                          |                          |         |
| Any cardiac symptoms               | 3 (42.9%)          | 10 (33.3%)               | 10 (33.3%)               | 0.882   |
| NYHA>2                             | 2 (18.2%)          | 6 (18.8%)                | 2 (6.7%)                 | 0.344   |
| LVMWT (mm)                         | 12.9 (+/-<br>2.2)  | 12.9 (+/-<br>2.9)        | 12.3 (+/-<br>2.8)        | 0.546   |
| LVMWT Z score                      | 7.3 (+/-2.3)       | 7.2 (+/-4.3)             | 6.2 (+/-3.1)             | 0.393   |
| Systolic impairment                | 1 (16.7%)          | 4 (21.1%)                | 1 (4.2%)                 | 0.23    |
| <b>Atrial arrhythmia</b>           | 3 (27.3%)          | 5 (15.6%)                | 0 (0%)                   | 0.025   |
| <b>Mortality</b>                   | 4 (36.4%)          | 4 (12.5%)                | 0 (0%)                   | 0.004   |

**Supplementary table 3: Clinical characteristics of patients with and without atrial arrhythmias**

|                                                        |                                   | <b>Atrial<br/>arrhythmia (8)</b> | <b>No atrial<br/>arrhythmia (70)</b> | <b>P value</b> |
|--------------------------------------------------------|-----------------------------------|----------------------------------|--------------------------------------|----------------|
| <b>Baseline<br/>clinical<br/>assessment<br/>(n=78)</b> | <b>Any symptoms</b>               | 2 (25%)                          | 22 (31.4%)                           | 0.153          |
|                                                        | <b>NYHA &gt;2</b>                 | 1 (12.5%)                        | 10 (14.3%)                           | 0.891          |
|                                                        | <b>Mean MLVWT<br/>(+/-SD)</b>     | 12.88 (2.03)                     | 12.77 (2.65)                         | 0.9105         |
|                                                        | <b>Concentric<br/>hypertrophy</b> | 7 (87.5%)                        | 58 (82.9%)                           | 0.581          |
|                                                        | <b>LVOT<br/>obstruction</b>       | 0 (0%)                           | 2 (2.9%)                             | 0.877          |
|                                                        | <b>Systolic<br/>impairment</b>    | 1 (12.5%)                        | 5 (7.1%)                             | 0.701          |
|                                                        | <b>Diastolic<br/>impairment</b>   | 1 (12.5%)                        | 5 (7.1%)                             | 0.715          |
| <b>Last clinical<br/>assessment<br/>(n=76)</b>         | <b>NYHA &gt;2</b>                 | 1 (12.5%)                        | 10 (10.3%)                           | 0.867          |
|                                                        | <b>Mean MLVWT<br/>(+/-SD)</b>     | 12.82 (1.73)                     | 13.01 (3.10)                         | 0.883          |
|                                                        | <b>Concentric<br/>hypertrophy</b> | 7 (87.5%)                        | 51 (72.9%)                           | 0.792          |
|                                                        | <b>LVOT<br/>obstruction</b>       | 0 (0%)                           | 1 (1.4%)                             | 0.782          |
|                                                        | <b>Systolic<br/>impairment</b>    | 3 (37.5%)                        | 1 (1.43%)                            | <0.001         |
|                                                        | <b>Diastolic<br/>impairment</b>   | 3 (37.5%)                        | 7 (10.0%)                            | 0.074          |

NYHA = New York Heart Association, LVOT = left ventricular outflow tract

## References

1. Elliott PM, Anastasakis A, Borger MA, Borggrefe M, Cecchi F, Charron P, et al. 2014 ESC Guidelines on diagnosis and management of hypertrophic cardiomyopathy: the Task Force for the Diagnosis and Management of Hypertrophic Cardiomyopathy of the European Society of Cardiology (ESC). *European heart journal*. 2014;35(39):2733-79.
2. Nagueh SF, Smiseth OA, Appleton CP, Byrd BF, 3rd, Dokainish H, Edvardsen T, et al. Recommendations for the Evaluation of Left Ventricular Diastolic Function by Echocardiography: An Update from the American Society of Echocardiography and the European Association of Cardiovascular Imaging. *Journal of the American Society of Echocardiography* : official publication of the American Society of Echocardiography. 2016;29(4):277-314.
3. O'Leary PW, Durongpisitkul K, Cordes TM, Bailey KR, Hagler DJ, Tajik J, et al. Diastolic ventricular function in children: a Doppler echocardiographic study establishing normal values and predictors of increased ventricular end-diastolic pressure. *Mayo Clinic proceedings*. 1998;73(7):616-28.
4. Wyman Lai LM, Meryl Cohen, and Tal Geva *Echocardiography in Pediatric and Congenital Heart Disease: From Fetus to Adult*: Wiley Blackwell; 2009.
5. Rijnbeek PR, Witsenburg M, Schrama E, Hess J, Kors JA. New normal limits for the paediatric electrocardiogram. *European heart journal*. 2001;22(8):702-11.
6. Sokolow M, Lyon TP. The ventricular complex in left ventricular hypertrophy as obtained by unipolar precordial and limb leads. 1949. *Annals of noninvasive electrocardiology* : the official journal of the International Society for Holter and Noninvasive Electrocardiology, Inc. 2001;6(4):343-68.
7. Taran LM, Szilagyi N. The duration of the electrical systole, Q-T, in acute rheumatic carditis in children. *Am Heart J*. 1947;33(1):14-26.
