# Supplementary material for: Friedreich’s ataxia-associated childhood hypertrophic cardiomyopathy: a national cohort study
Source: PubMed Central journal article supplement (PMC9046745; doi:10.1136/archdischild-2021-322455), 2021-10-05

### Kaplan-Meier survival estimates

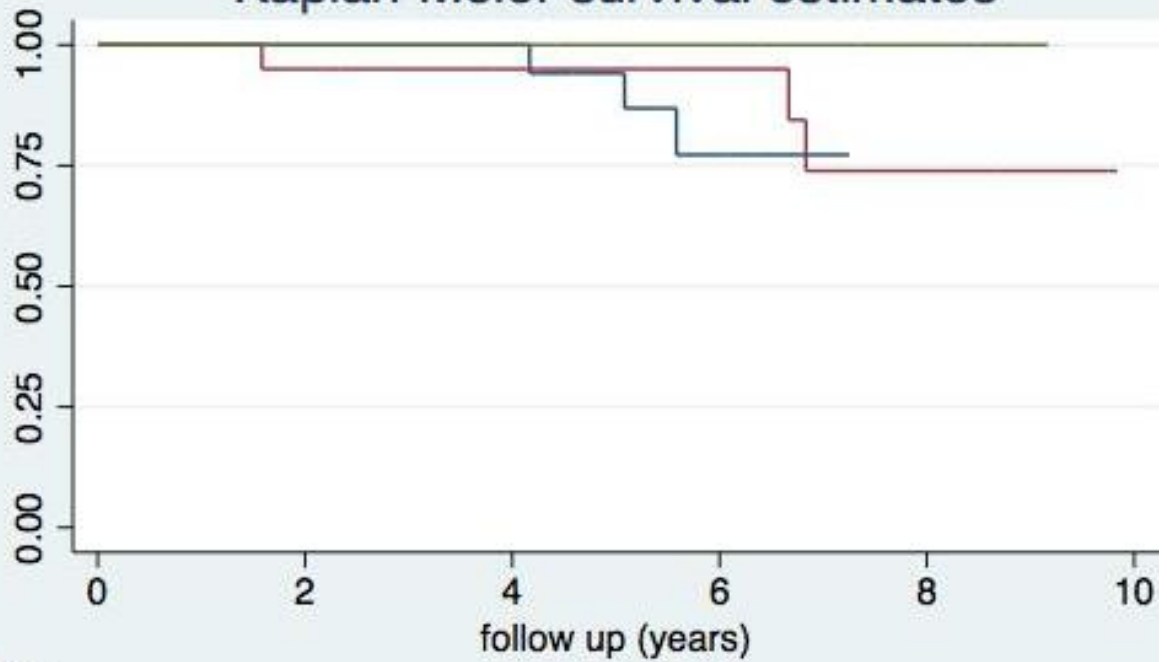

| Number at risk |    | 0  | 2  | 4  | 6 | 8 | 10 |
|----------------|----|----|----|----|---|---|----|
| MLVWT <12mm    | 26 | 23 | 19 | 8  | 3 | 3 | 3  |
| MLVWT 12-<15mm | 26 | 19 | 15 | 9  | 7 | 3 | 3  |
| MLVWT >=15mm   | 17 | 15 | 12 | 11 | 5 | 2 | 2  |

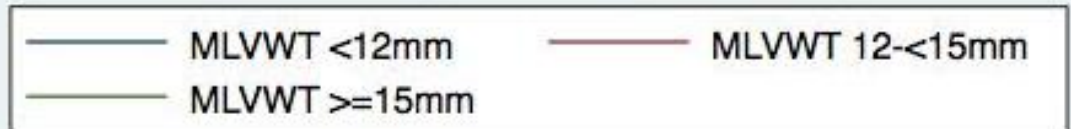

Supplement: archdischild-2021-322455supp002.pdf [file archdischild-2021-322455supp002.pdf]
